# Supplementary material for: Variable protein expression in marine-derived filamentous fungus Penicillium chrysogenum in response to varying copper concentrations and salinity
Source: Royal Society of Chemistry journal article supplement (doi:10.1039/c9mt00316a), 2020-04-06
Supplement: c9mt00316a1.pdf [file c9mt00316a1.pdf]

**Supplementary Table T1.** Data representing number of filamentous marine-derived fungi that were tolerant to varying concentrations of Cu (II) screening on solid media.

| <b>Colony diameter<br/>(mm)</b> | <b>Concentration of CuSO<sub>4</sub> (ppm)</b> |            |             |             |
|---------------------------------|------------------------------------------------|------------|-------------|-------------|
|                                 | <b>500</b>                                     | <b>750</b> | <b>1000</b> | <b>1250</b> |
| <b>36-50</b>                    | 7                                              | 6          | 0           | 0           |
| <b>21-35</b>                    | 23                                             | 10         | 2           | 0           |
| <b>&lt; 20</b>                  | 31                                             | 19         | 6           | 3           |
| <b>Total</b>                    | <b>61</b>                                      | <b>35</b>  | <b>8</b>    | <b>3</b>    |

Supplementary Figure S1.

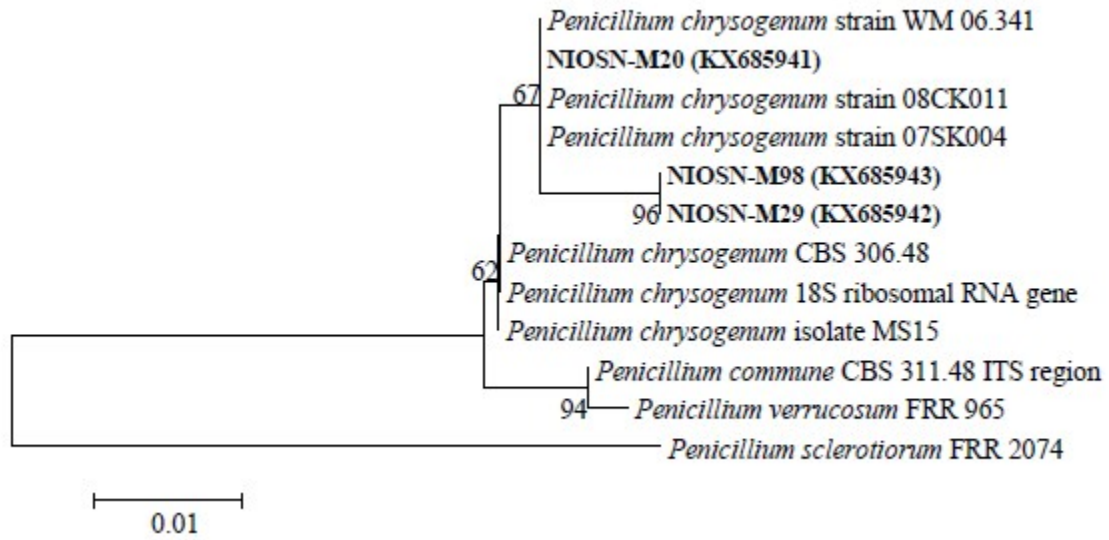

Phylogenetic relationships of fungal isolates used in this study inferred from NJ analysis of the ITS sequences using MEGA ver.5. The bootstrap values of 1000 were used for the analysis

**Supplementary Figure S2.** Photomicrography of the isolate #NIOSN-M20 under light microscope and Scanning Electron Microscope

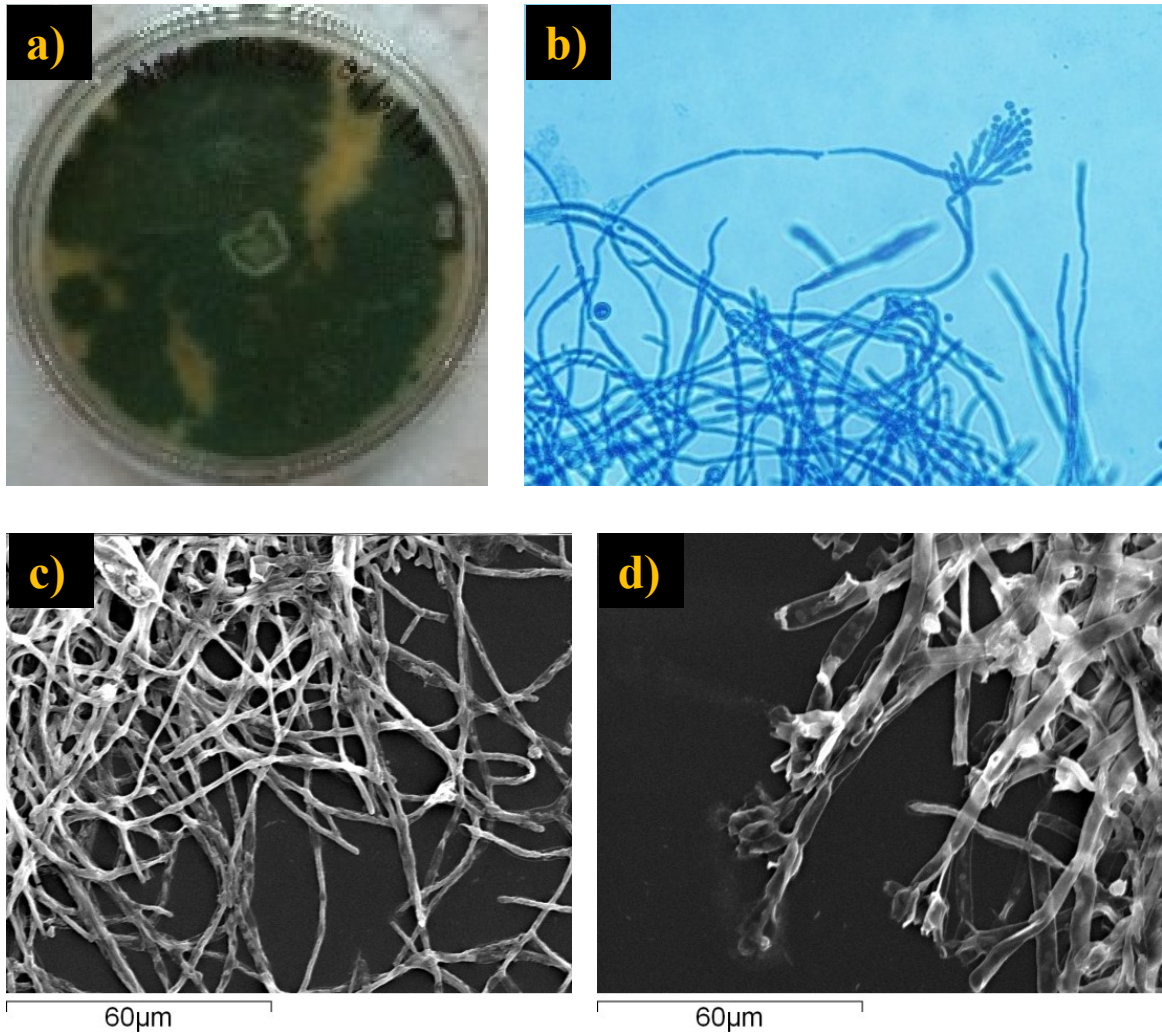

**Legend**

- a) Visual appearance of isolate #NIOSN-M20 grown on CDA
- b) Isolate viewed under compound microscope (100x magnification)
- c) Isolate under control condition (0 ppm Cu (II), 1000x magnification)
- d) Isolate under test condition (100 ppm Cu (II), 1000x magnification)
